# Supplementary material for: Association of Neural Reward Circuitry Function With Response to Psychotherapy in Youths With Anxiety Disorders
Source: Atypon-hosted journal article supplement (doi:10.1176/appi.ajp.2020.20010094), 2021-01-21

## **SUPPLEMENTAL METHODS**

### **Participants**

Ninety-two youths with anxiety completed the pre-treatment monetary reward task in the magnetic resonance imaging (MRI) scanner. Data from 11 youths were excluded because of issues with scanner alignment ( $n=2$ ), excessive motion in the scanner ( $n=2$ ), and study withdrawal ( $n=7$ ). Of the 81 patients with usable fMRI pre-treatment data, 72 had completed post-treatment clinical assessments. Post-treatment data were missing either because of study withdrawal/treatment dropout ( $n=5$ ) or missing/incomplete diagnostician-rated forms ( $n=4$ ).

All patients were required to meet DSM-IV criteria for either generalized anxiety disorder (GAD), separation anxiety disorder (SAD), and/or social phobia (SoPh). Of the 81 anxious youths with usable pre-treatment fMRI data, 48 patients were diagnosed with GAD only, eight patients were diagnosed with SoPh only, and 15 patients were diagnosed with SAD only. Further, eight patients were diagnosed with GAD and SoPh, one patient was diagnosed with GAD and SAD, and one patient was diagnosed with GAD, SoPh, and SAD. Other comorbid diagnoses included specific phobia ( $n=10$ ), attention-deficit hyperactivity disorder- not otherwise specified ( $n=1$ ), attention-deficit hyperactivity disorder- inattentive type ( $n=1$ ), enuresis ( $n=2$ ), tic disorder ( $n=3$ ), oppositional defiant disorder ( $n=2$ ), and panic disorder ( $n=1$ ).

### **Sensitivity Analysis: Therapy Type**

Interactions between therapy type (CBT, CCT) and neural activation/connectivity (centered) on treatment response at post-treatment were examined using logistic regression in SPSS v25. A model was run for each cluster resulting from the BOLD or gPPI analyses using Benjamini-Hochberg correction procedures<sup>45</sup> with a false discovery rate of 0.05. Significance was evaluated using the change in  $\chi^2$  when the interaction term was added to the model. Additional analyses were also performed in SPM12 to examine interactions between treatment response and therapy type on neural activation across the whole brain.

## **SUPPLEMENTAL RESULTS**

### **Sensitivity Analysis: Sample Variance**

Given unequal group sizes, post-hoc analyses were performed to verify that unequal sample variance was not driving findings from planned comparisons examining whether 1) treatment responders differed from non-responders and 2) treatment responders and healthy youth as a combined group differed from non-responders. First, we calculated Welch's *t*-tests, and examined Levene's statistics testing homogeneity of variance, to examine group differences in extracted parameter estimates. Findings suggest that group differences in magnitude, rather than variance, drive present findings (Welch's  $t = -3.34$  and  $-3.60$ ,  $p_s = 001$ , Levene's test  $p_s > .33$ ). Second, we randomly selected 24 responders to include in responder > non-responder *t*-test analysis and found a similar pattern of results, suggesting that unequal cell sizes are not contributing unduly to the present findings.

**TABLE S1.** Results from exploratory whole-brain one-way ANOVA for the win>loss contrast (voxel-wise threshold of  $p < .005$  uncorrected; extent threshold of 20 voxels, or 160 mm<sup>3</sup>).

| Region                                     | Brodmann area | cluster size (mm <sup>3</sup> ) | peak MNI [x,y,z] | peak voxel-level Z | cluster-level $p_{\text{FWE-corrected}}$ |
|--------------------------------------------|---------------|---------------------------------|------------------|--------------------|------------------------------------------|
| <b>Differences between 3 groups</b>        |               |                                 |                  |                    |                                          |
| R medial PFC                               | 10            | 1792                            | 2, 52, 20        | 3.14               | .503                                     |
| R primary motor cortex                     | 4             | 544                             | 62, -6, 24       | 3.42               | .918                                     |
| L medial PFC                               | 10            | 464                             | -22, 52, 18      | 3.05               | .938                                     |
| R angular gyrus                            | 39            | 328                             | 30, -80, 32      | 2.93               | .966                                     |
| L medial PFC                               | 10            | 256                             | -18, 42, -2      | 2.97               | .977                                     |
| L inferior frontal gyrus                   | 44            | 176                             | -44, 12, 28      | 3.04               | .987                                     |
| <b>Responders&gt;Non-Responders</b>        |               |                                 |                  |                    |                                          |
| R primary motor cortex                     | 4             | 1384                            | 60, -6, 24       | 3.51               | .683                                     |
| sgACC/NAcc                                 | 25            | 1072                            | 4, 16, -6        | 3.16               | .607                                     |
| L medial PFC                               | 10            | 776                             | -18, 40, -4      | 3.43               | .840                                     |
| L primary motor cortex                     | 4             | 232                             | -42, -6, 16      | 3.11               | .958                                     |
| L insula                                   | 13            | 288                             | -28, 10, 12      | 2.99               | .948                                     |
| R inferior frontal gyrus                   | 44            | 272                             | 46, 14, 18       | 2.78               | .951                                     |
| R premotor cortex                          | 6             | 224                             | 50, -6, 38       | 2.84               | .960                                     |
| <b>Non-Responders&gt;Responders</b>        |               |                                 |                  |                    |                                          |
| <i>No suprathreshold clusters</i>          |               |                                 |                  |                    |                                          |
| <b>Youth with anxiety&gt;Healthy youth</b> |               |                                 |                  |                    |                                          |
| R medial PFC                               | 10            | 10776                           | 0, 52, 18        | 3.72               | .016                                     |
| R angular gyrus                            | 39            | 2784                            | 30, -80, 30      | 3.55               | .383                                     |
| L inferior frontal gyrus                   | 44            | 1072                            | -42, 12, 26      | 3.44               | .764                                     |
| R supramarginal gyrus                      | 40            | 576                             | 56, -22, 16      | 3.10               | .888                                     |
| L inferior frontal gyrus                   | 45            | 296                             | -42, 28, 12      | 2.98               | .947                                     |
| R medial PFC                               | 10            | 272                             | 42, 48, 16       | 3.16               | .951                                     |
| R superior temporal gyrus                  | 22            | 184                             | 54, 8, -6        | 2.94               | .966                                     |
| L medial PFC                               | 10            | 160                             | -28, 62, 8       | 2.79               | .970                                     |
| <b>Healthy youth&gt;Youth with anxiety</b> |               |                                 |                  |                    |                                          |
| <i>No suprathreshold clusters</i>          |               |                                 |                  |                    |                                          |

**FIGURE S1.** Region-of-interest (ROI) mask of the medial prefrontal cortex and striatum, used in primary BOLD analyses.

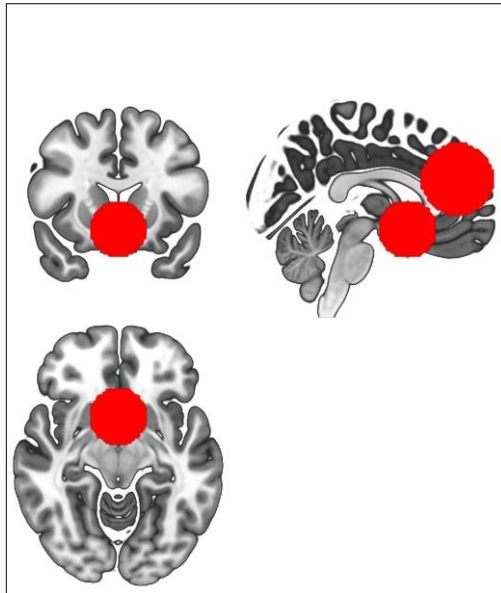

**FIGURE S2.** Parameter estimates from the mPFC cluster during win relative to control (win>control) and loss relative to control (loss>control) were extracted using the MarsBar toolbox in SPM12. This cluster was derived from the original win>loss analysis. Mean parameter estimates for win>control and loss>control are depicted below.

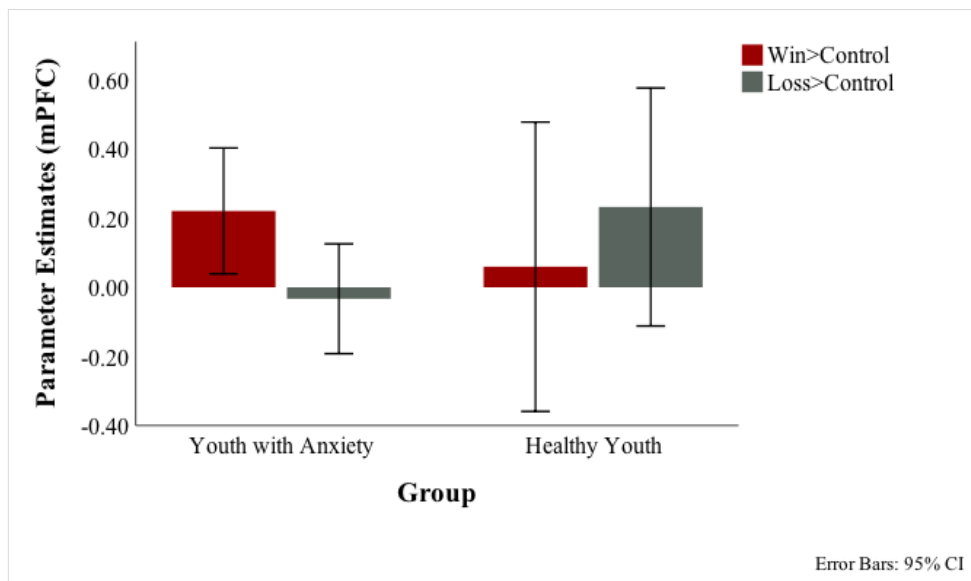

**FIGURE S3.** Parameter estimates from the sgACC/NAcc cluster during win relative to control (win>control) and loss relative to control (loss>control) were extracted using the MarsBar toolbox in SPM12. This cluster was derived from the original win>loss analysis. Mean parameter estimates for win>control and loss>control are depicted below. Differences between groups were probed using *t*-tests, with Hedges' *g* measures of effect size.

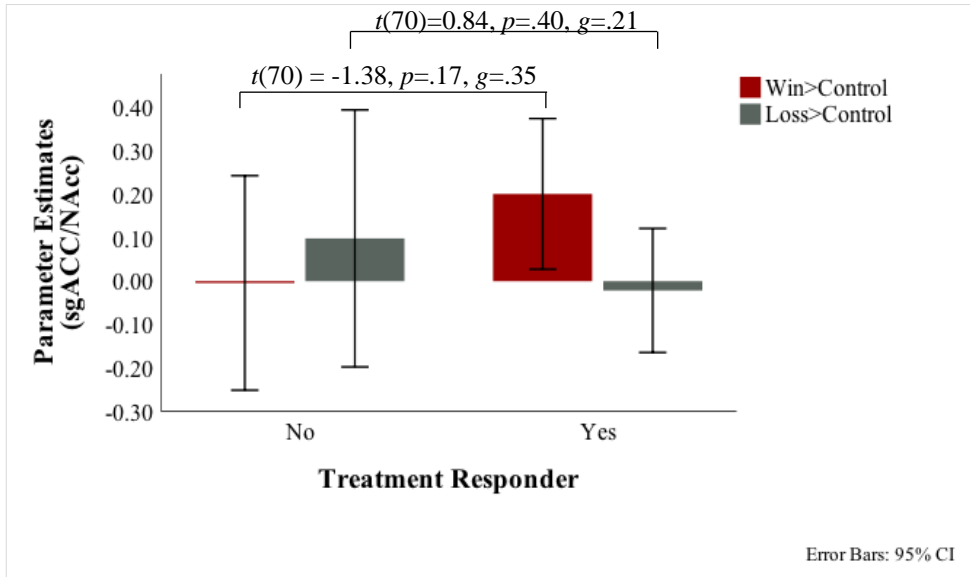

**FIGURE S4.** Parameter estimates (betas) from the sgACC/NAcc cluster during win only and loss only were extracted using the MarsBar toolbox in SPM12. This cluster was derived from the original win>loss analysis. Mean parameter estimates are depicted below. Differences between groups were probed using *t*-tests, with Hedges' *g* measures of effect size.

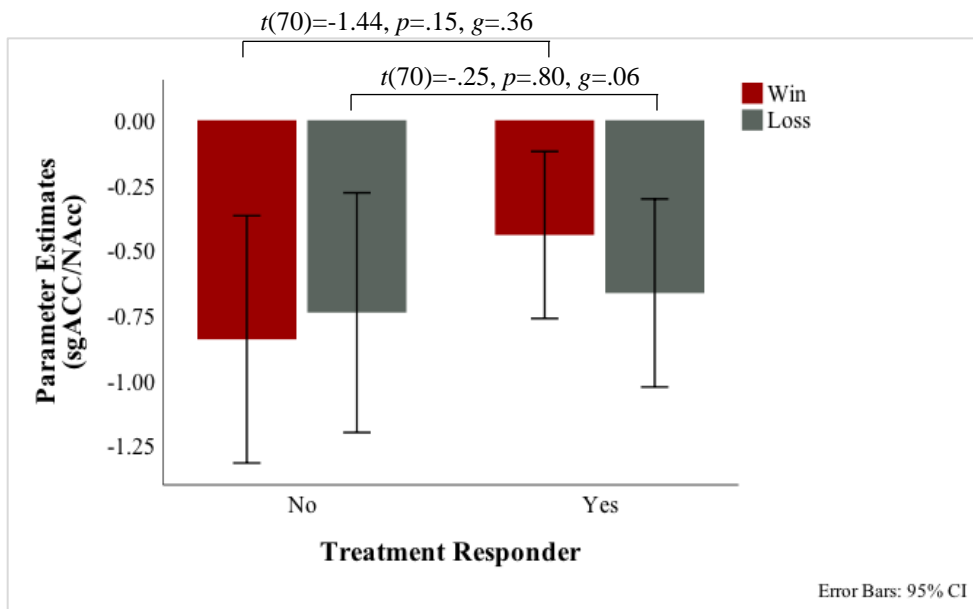

Supplement: appi.ajp.2020.20010094.ds001.pdf [file appi.ajp.2020.20010094.ds001.pdf]
